# Supplementary material
Source: PubMed Central journal article supplement (PMC7861502)
Supplement: str-52-563-s001.pdf [file str-52-563-s001.pdf]

SUPPLEMENTAL MATERIAL

Supplement to: **Excess cerebrovascular mortality in the U.S. during the COVID-19 pandemic**

Richa Sharma MD MPH\* and Lindsey R. Kuohn BA\*, Daniel M. Weinberger PhD,  
Joshua L. Warren PhD, Lauren H. Sansing MD, Adam Jasne MD,  
Guido Falcone MD, Amar Dhand MD DPhil, Kevin N Sheth MD

Supplemental Figures: Page 2-3

Supplemental Tables: Page 4-8

**Supplemental Figure I.** Weekly counts of EMS calls for cerebrovascular disease from January 1-May 16 in years 2017–2020.

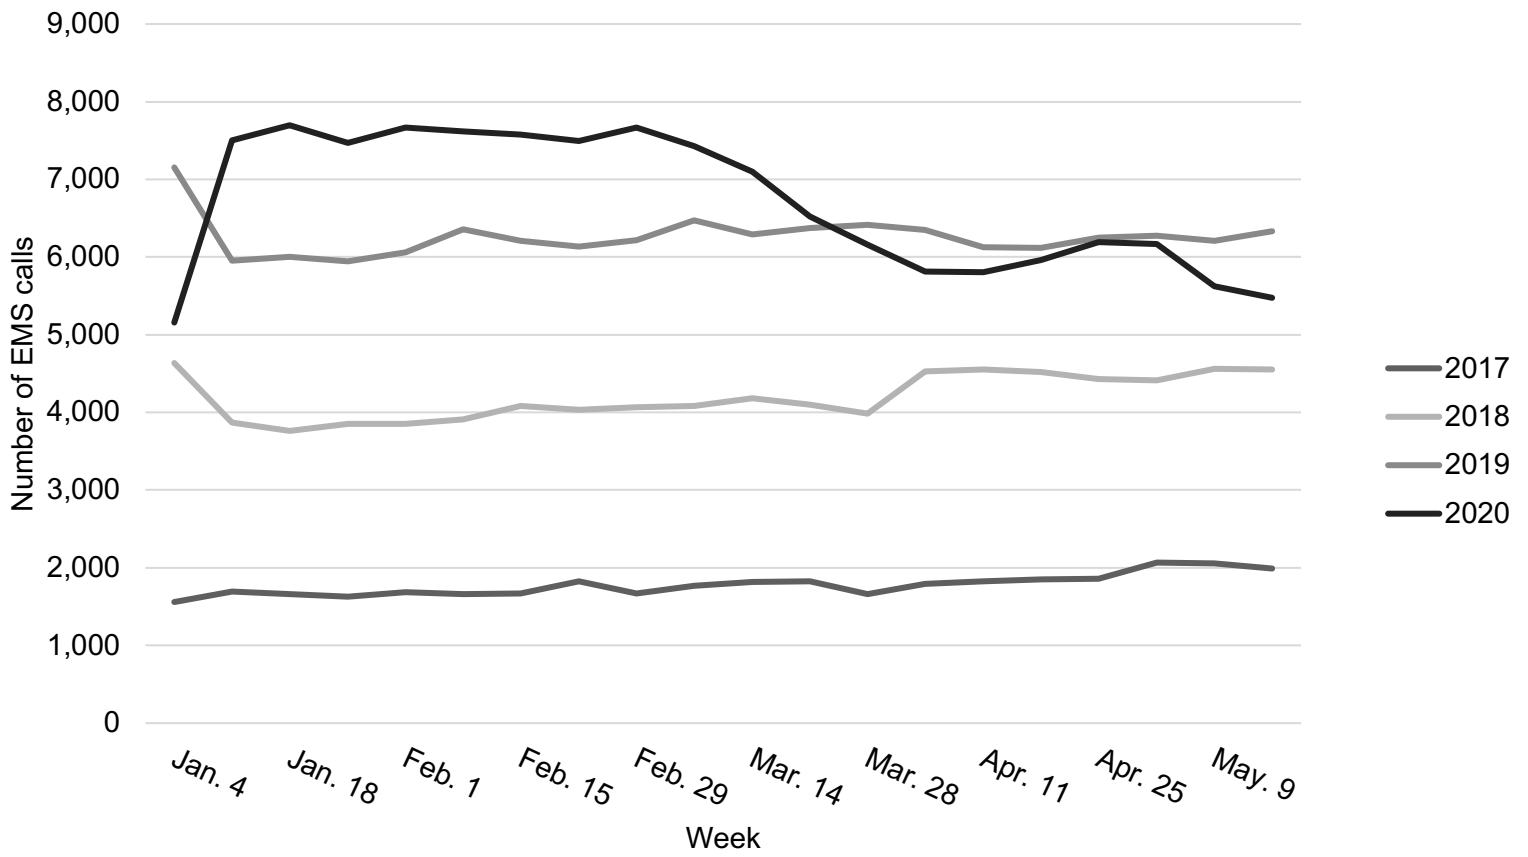

**Supplemental Figure II.** (A) Cardiovascular-related EMS calls and cumulative COVID-19 deaths are plotted on the primary y-axis, while excess cardiovascular-related deaths are plotted on the secondary y-axis. (B) All EMS calls and cumulative COVID-19 deaths (transformed by multiplying by 10) are plotted on the primary y-axis, and excess Alzheimer's deaths are plotted on the secondary y-axis.

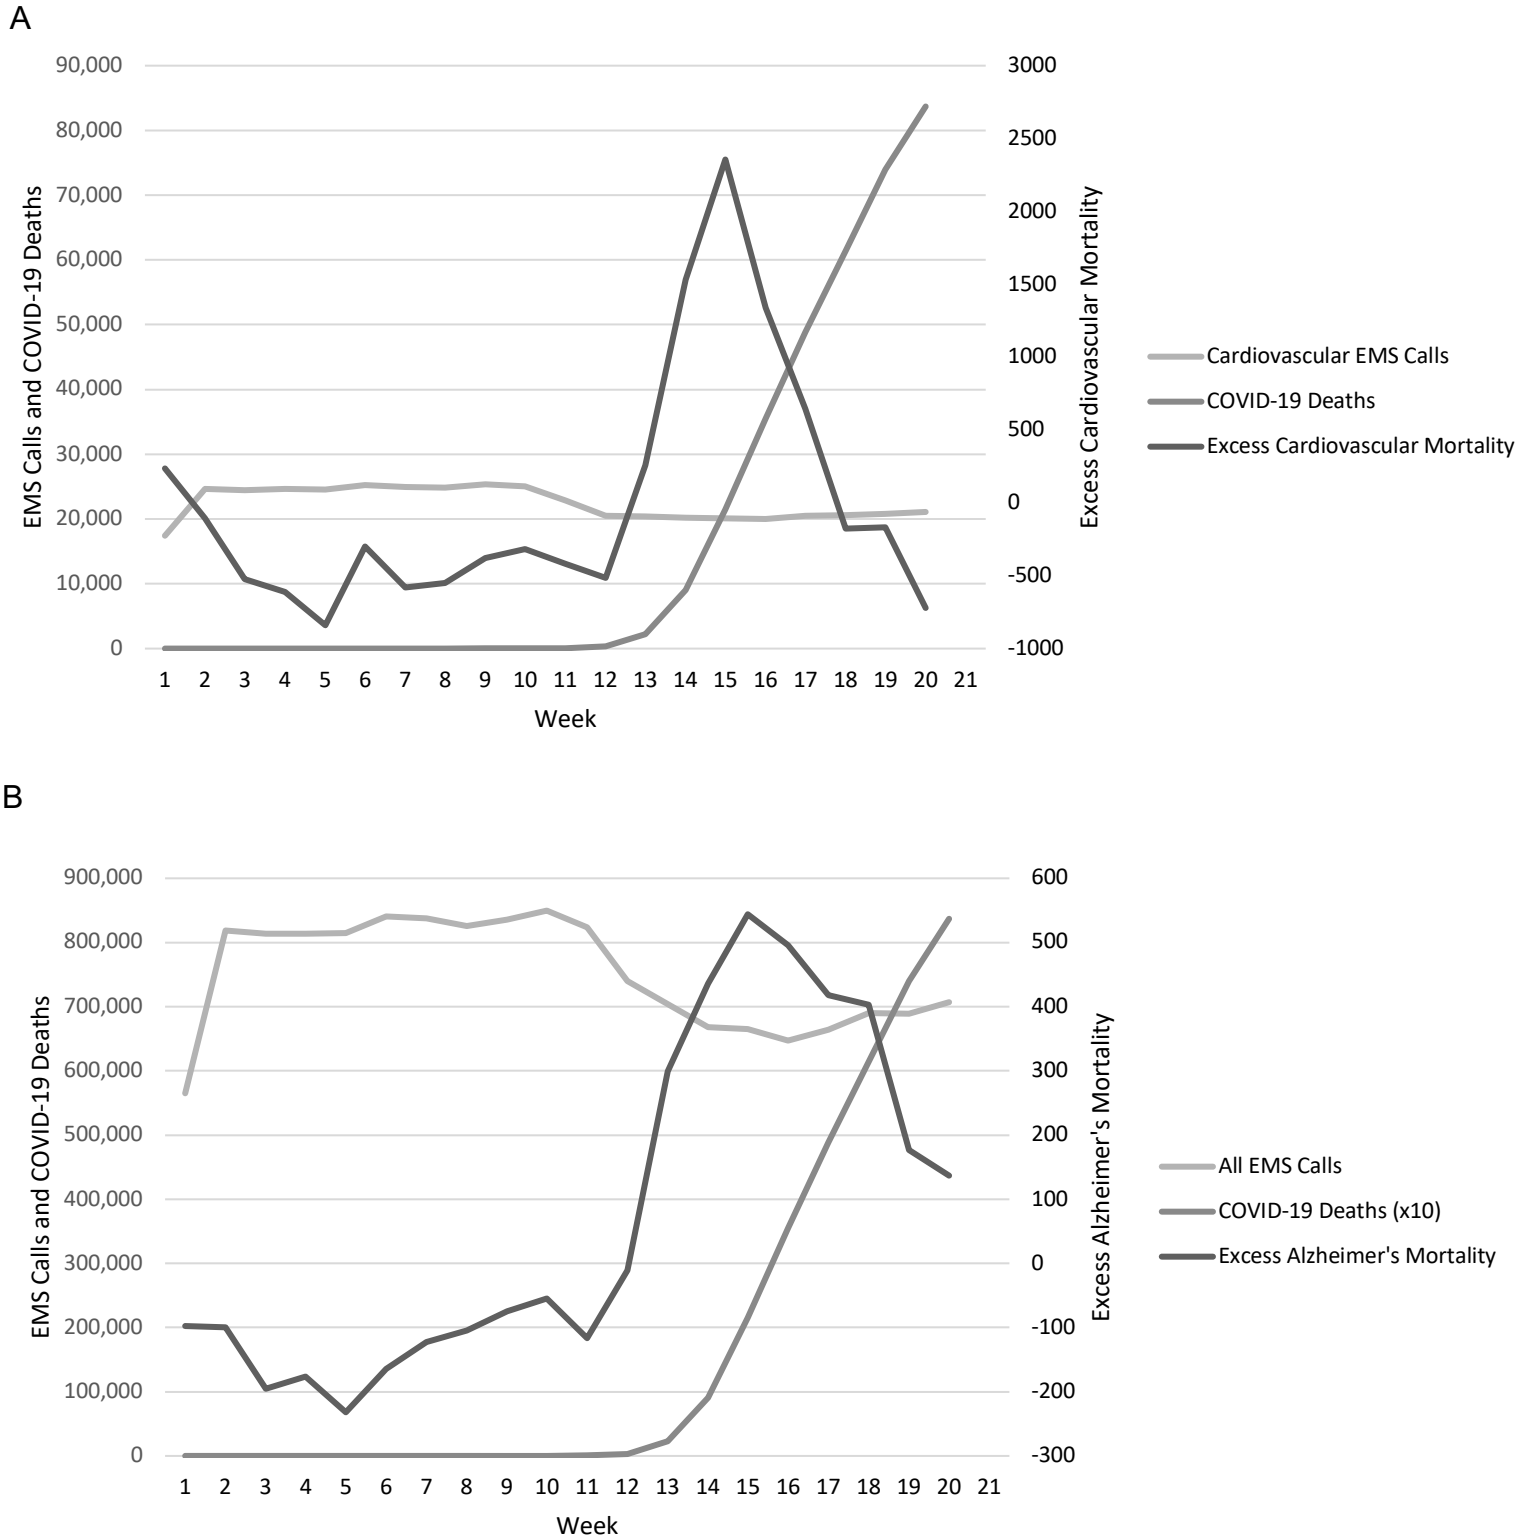

**Supplemental Table I.** National weekly counts of cerebrovascular deaths from 2014-2020 with weekly estimates of expected cerebrovascular mortality in 2020.

| Week                                 | 1                        | 2                        | 3                        | 4                        | 5                     | 6                     | 7                     | 8                     | 9                     | 10                    | 11                    | 12                    | 13                    | 14                    | 15                    | 16                    | 17                    | 18                    | 19                    | 20                       |
|--------------------------------------|--------------------------|--------------------------|--------------------------|--------------------------|-----------------------|-----------------------|-----------------------|-----------------------|-----------------------|-----------------------|-----------------------|-----------------------|-----------------------|-----------------------|-----------------------|-----------------------|-----------------------|-----------------------|-----------------------|--------------------------|
| Week End Date                        | 4-Jan                    | 11-Jan                   | 18-Jan                   | 25-Jan                   | 1-Feb                 | 8-Feb                 | 15-Feb                | 22-Feb                | 29-Feb                | 7-Mar                 | 14-Mar                | 21-Mar                | 28-Mar                | 4-Apr                 | 11-Apr                | 18-Apr                | 25-Apr                | 2-May                 | 9-May                 | 16-May                   |
| <b>2014</b>                          | 1428                     | 2515                     | 2501                     | 2534                     | 2501                  | 2476                  | 2468                  | 2602                  | 2452                  | 2345                  | 2337                  | 2448                  | 2349                  | 2386                  | 2379                  | 2269                  | 2360                  | 2298                  | 2374                  | 2253                     |
| <b>2015</b>                          | 2949                     | 2860                     | 2801                     | 2799                     | 2710                  | 2715                  | 2675                  | 2737                  | 2682                  | 2592                  | 2683                  | 2562                  | 2504                  | 2459                  | 2513                  | 2388                  | 2417                  | 2440                  | 2482                  | 2380                     |
| <b>2016</b>                          | 2809                     | 2675                     | 2682                     | 2806                     | 2668                  | 2590                  | 2700                  | 2600                  | 2670                  | 2663                  | 2587                  | 2631                  | 2581                  | 2595                  | 2604                  | 2492                  | 2432                  | 2493                  | 2469                  | 2449                     |
| <b>2017</b>                          | 2976                     | 2887                     | 2885                     | 2789                     | 2801                  | 2793                  | 2840                  | 2754                  | 2845                  | 2750                  | 2661                  | 2709                  | 2633                  | 2625                  | 2703                  | 2623                  | 2531                  | 2535                  | 2531                  | 2575                     |
| <b>2018</b>                          | 3139                     | 3163                     | 3152                     | 3067                     | 2878                  | 2910                  | 2857                  | 2753                  | 2811                  | 2734                  | 2730                  | 2765                  | 2693                  | 2723                  | 2785                  | 2592                  | 2660                  | 2610                  | 2406                  | 2492                     |
| <b>2019</b>                          | 2714                     | 2898                     | 2930                     | 2788                     | 2904                  | 2779                  | 2791                  | 2861                  | 2769                  | 2901                  | 2874                  | 2786                  | 2839                  | 2778                  | 2774                  | 2646                  | 2619                  | 2722                  | 2602                  | 2583                     |
| <b>2020 Observed</b>                 | 2907                     | 2961                     | 3019                     | 2922                     | 2825                  | 2801                  | 2816                  | 2815                  | 2868                  | 2854                  | 2888                  | 2795                  | 2828                  | 2925                  | 2949                  | 2960                  | 2803                  | 2808                  | 2579                  | 2661                     |
| <b>2020 Expected*<br/>95% CI</b>     | 2942<br>2811, 3103       | 2951<br>2818, 3114       | 2933<br>2824, 3123       | 2941<br>2825, 3122       | 2940<br>2818, 3118    | 2945<br>2811, 3107    | 2909<br>2792, 3098    | 2912<br>2776, 3079    | 2894<br>2754, 3064    | 2873<br>2737, 3044    | 2842<br>2714, 3023    | 2831<br>2693, 3005    | 2799<br>2670, 2984    | 2790<br>2650, 2960    | 2756<br>2630, 2944    | 2747<br>2609, 2914    | 2726<br>2585, 2893    | 2709<br>2569, 2875    | 2671<br>2544, 2849    | 2631<br>2523, 2826       |
| <b>2020 Excess Deaths<br/>95% CI</b> | -35<br>-196, 96          | 10<br>-153, 143          | 86<br>-104, 195          | -19<br>-200, 97          | -115<br>-293, 7       | -144<br>-306, -10     | -93<br>-282, 24       | -97<br>-264, 39       | -26<br>-196, 114      | -19<br>-190, 117      | 46<br>-135, 174       | -36<br>-210, 102      | 29<br>-156, 158       | 135<br>-35, 275       | 193<br>5, 319         | 213<br>46, 351        | 77<br>-90, 218        | 99<br>-67, 239        | -92<br>-270, 35       | 30<br>-165, 138          |
| <b>Observed/Expected<br/>95% CI</b>  | 0.988<br>0.937,<br>1.034 | 1.003<br>0.951,<br>1.051 | 1.029<br>0.967,<br>1.069 | 0.994<br>0.936,<br>1.034 | 0.961<br>0.906, 1.002 | 0.951<br>0.902, 0.996 | 0.968<br>0.909, 1.009 | 0.967<br>0.914, 1.014 | 0.991<br>0.936, 1.041 | 0.993<br>0.938, 1.043 | 1.016<br>0.955, 1.064 | 0.987<br>0.930, 1.038 | 1.010<br>0.948, 1.059 | 1.048<br>0.988, 1.104 | 1.070<br>1.002, 1.121 | 1.078<br>1.016, 1.135 | 1.028<br>0.969, 1.084 | 1.037<br>0.977, 1.093 | 0.966<br>0.905, 1.014 | 1.011<br>0.942,<br>1.055 |

\*Expected counts are calculated using the ExcessILI package, which fits Poisson regression models to the weekly counts of cerebrovascular deaths in 2014-2019.  
Abbreviations: CI=confidence interval

**Supplemental Table II.** Estimated slopes of weekly cerebrovascular-related EMS calls in each year from 2017 to 2020 from linear regression models.

| <b>Year</b> | <b><math>\beta</math> (95% CI)</b> | <b>p</b> |
|-------------|------------------------------------|----------|
| 2020        | -92.83 (-151.58, -34.08)           | 0.004    |
| 2019        | -1.69 (-23.24, 19.87)              | 0.9      |
| 2018        | 32.90 (14.47, 51.33)               | 0.001    |
| 2017        | 20.53 (14.58, 26.49)               | <0.001   |

Abbreviations: CI=confidence intervals

**Supplemental Table III.** Summary of the variability among counties in the percent change in time spent at home on the date of the projected peak in each state.

| State          | First Quartile | Median | Third Quartile |
|----------------|----------------|--------|----------------|
| Alabama        | 14             | 15     | 18             |
| Arizona        | 11             | 13.5   | 16             |
| California     | 9              | 12     | 15             |
| Colorado       | 10             | 12     | 13             |
| Delaware       | 17.5           | 20     | 22             |
| Florida        | 10             | 11     | 12             |
| Georgia        | 8              | 10     | 12             |
| Hawaii         | 20             | 22     | 23             |
| Idaho          | 15             | 15     | 16             |
| Illinois       | 15             | 17     | 22             |
| Indiana        | 18             | 19     | 22             |
| Iowa           | 8              | 9.5    | 13             |
| Kansas         | 12             | 15     | 17             |
| Kentucky       | 16             | 17     | 20             |
| Louisiana      | 14             | 17     | 19             |
| Maine          | 5              | 6.5    | 8              |
| Maryland       | 18.5           | 22     | 24             |
| Massachusetts  | 10             | 11.5   | 12.5           |
| Michigan       | 21             | 23     | 26             |
| Minnesota      | 13             | 15     | 18             |
| Mississippi    | 10             | 11     | 12             |
| Missouri       | 11             | 15     | 17             |
| Nebraska       | 11             | 14.5   | 16.5           |
| Nevada         | 15             | 18     | 20.5           |
| New Jersey     | 22             | 26     | 29             |
| New Mexico     | 14             | 15     | 18             |
| New York       | 18             | 19     | 25             |
| New York City  | 32             | 32     | 32             |
| Ohio           | 8              | 9      | 10             |
| Oklahoma       | 11             | 13     | 15             |
| Oregon         | 7              | 9      | 10             |
| Pennsylvania   | 17             | 19     | 22             |
| South Carolina | 16             | 18     | 20             |
| Tennessee      | 10             | 11     | 12             |
| Texas          | 11             | 15     | 18             |
| Utah           | 12             | 15     | 18             |
| Virginia       | 16             | 18.5   | 21             |
| Washington     | 10             | 11     | 12             |
| West Virginia  | 10             | 11     | 11             |
| Wisconsin      | 11             | 12     | 13             |

**Supplemental Table IV.** Adjusted negative binomial regression models of excess geography-level cardiovascular mortality estimates from March 1<sup>st</sup> through May 16<sup>th</sup>.  
Abbreviations: CI=confidence interval.

| <b>Covariate</b>                             | <b>Adjusted Model</b>       |               |
|----------------------------------------------|-----------------------------|---------------|
|                                              | <b>Incidence Rate Ratio</b> | <b>95% CI</b> |
| Change in time spent home (per 10% increase) | 1.05                        | 1.01, 1.08    |
| Total COVID-19 deaths per capita             | 1.04                        | 1.03, 1.06    |
| COVID-19 mortality data completeness         | 0.97                        | 0.84, 1.12    |

**Supplemental Table V.** Adjusted negative binomial regression models of excess state-level Alzheimer’s related mortality estimates from March 1<sup>st</sup> through May 16<sup>th</sup>.  
Abbreviations: CI=confidence interval.

| <b>Covariate</b>                             | <b>Adjusted Model</b>       |               |
|----------------------------------------------|-----------------------------|---------------|
|                                              | <b>Incidence Rate Ratio</b> | <b>95% CI</b> |
| Change in time spent home (per 10% increase) | 1.03                        | 0.97, 1.10    |
| Total COVID-19 deaths per capita             | 1.05                        | 1.01, 1.09    |
| COVID-19 mortality data completeness         | 0.86                        | 0.65, 1.13    |
